# Supplementary material for: Targeting Microtubule-Associated Protein Tau in Chemotherapy-Resistant Models of High-Grade Serous Ovarian Carcinoma
Source: MDPI journal article supplement (doi:10.3390/cancers14184535), 2022-09-19
Supplement: s1 [file s1]

SUPPLEMENTARY TABLE S1. IC50 for paclitaxel and carboplatin.

| Cell line    | IC50 paclitaxel, nM | IC50 carboplatin, $\mu$ M |
|--------------|---------------------|---------------------------|
| OVCAR-4      | 4.1 $\pm$ 0.6       | 111.0 $\pm$ 2.8           |
| STOSE        | 70.3 $\pm$ 5.1      | 126.7 $\pm$ 13.7          |
| OVCAR4-PR2   | 20.5 $\pm$ 1.2      | 98.0 $\pm$ 3.4            |
| STOSE-PR25   | 216.6 $\pm$ 10.0    | nd                        |
| STOSE-PR25-3 | 177.7 $\pm$ 8.6     | nd                        |
| STOSE-PR50   | 265.2 $\pm$ 13.6    | nd                        |
| STOSE-PR50-2 | 200.3 $\pm$ 10.6    | nd                        |
| STOSE-PR50-3 | 214.8 $\pm$ 16.4    | nd                        |

nd – not determined

The data are an average of 4 independent experiments conducted with 8 replicas  $\pm$  standard deviation.
